# Supplementary material for: Molecular and seasonal characteristics of organic vapors in urban Beijing: insights from Vocus-PTR measurements
Source: Copernicus journal article supplement (doi:10.5194/egusphere-2024-1325), 2024-05-22
Supplement: Supplementary file 1 [file egusphere-2024-1325-supplement.pdf]

## Supporting Information for:

### **Molecular and seasonal characteristics of organic vapors in urban Beijing: insights from Vocus-PTR measurements**

Zhaojin An<sup>1,2</sup>, Rujing Yin<sup>3</sup>, Xinyan Zhao<sup>1</sup>, Xiaoxiao Li<sup>4</sup>, Yi Yuan<sup>1</sup>, Junchen Guo<sup>1</sup>, Yuyang Li<sup>1</sup>, Xue Li<sup>5</sup>, Dandan Li<sup>1</sup>, Yaowei Li<sup>2</sup>, Dongbin Wang<sup>1</sup>, Chao Yan<sup>6</sup>, Kebin He<sup>1</sup>, Douglas R. Worsnop<sup>7,8</sup>, Frank N. Keutsch<sup>2</sup>, Jingkun Jiang<sup>1,\*</sup>

<sup>1</sup>State Key Joint Laboratory of Environment Simulation and Pollution Control, School of Environment, Tsinghua University, 100084, Beijing, China

<sup>2</sup>School of Engineering and Applied Sciences, Harvard University, Cambridge, Massachusetts 02138, USA

<sup>3</sup>Key Laboratory of Industrial Ecology and Environmental Engineering (Ministry of Education), School of Environmental Science and Technology, Dalian University of Technology, 116024, Dalian, China

<sup>4</sup>School of Resource and Environmental Sciences, Wuhan University, 430072, Wuhan, China

<sup>5</sup>School of Environment, Henan Normal University, 453007, Xinxiang, China

<sup>6</sup>Joint International Research Laboratory of Atmospheric and Earth System Research, School of Atmospheric Sciences, Nanjing University, 210023, Nanjing, China

<sup>7</sup>Institute for Atmospheric and earth System Research / Physics, Faculty of Science, University of Helsinki, Helsinki 00014, Finland

<sup>8</sup>Aerodyne Research, Inc., Billerica, Massachusetts 01821, USA

\*Corresponding author: Jingkun Jiang (email: [jiangjk@tsinghua.edu.cn](mailto:jiangjk@tsinghua.edu.cn))

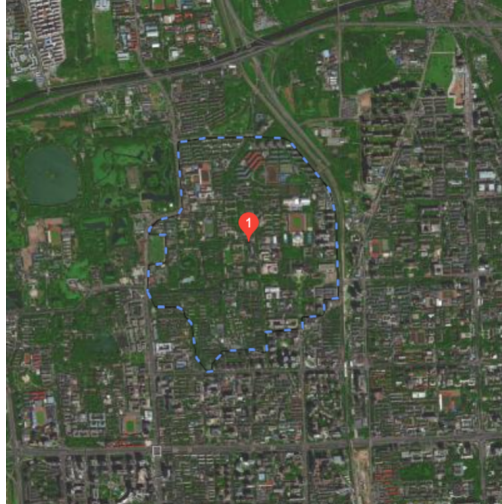

Figure S1. The map of the observation site (© Baidu Maps). The boundary of the campus of Tsinghua University is labeled as the dashed blue line, part of which overlaps with traffic roads. The site is approximately 1 kilometer away from the nearby traffic roads.

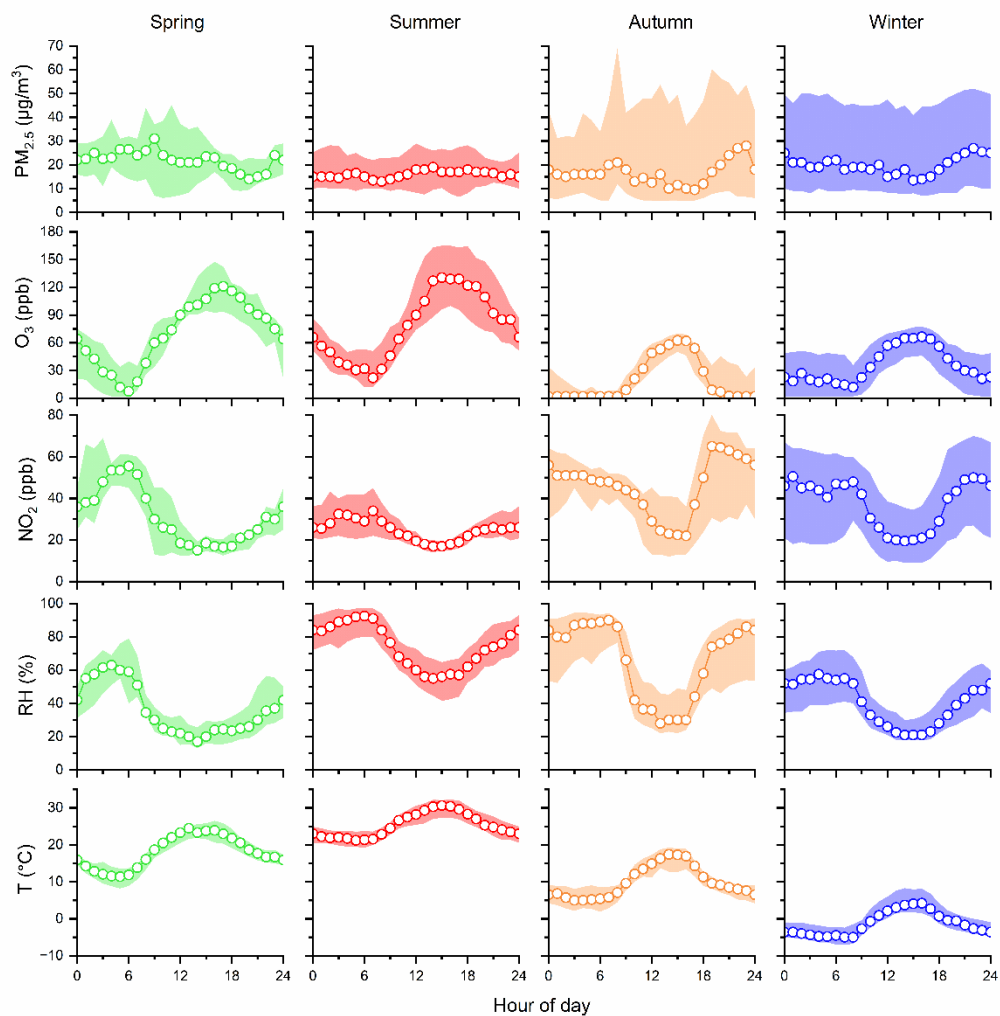

Figure S2. Median diurnal variations of PM<sub>2.5</sub>, O<sub>3</sub>, NO<sub>x</sub> (NO+NO<sub>2</sub>), relative humidity (RH), and temperature (T) in four seasons. The shaded areas in the graph represent the 25<sup>th</sup> and 75<sup>th</sup> percentiles.

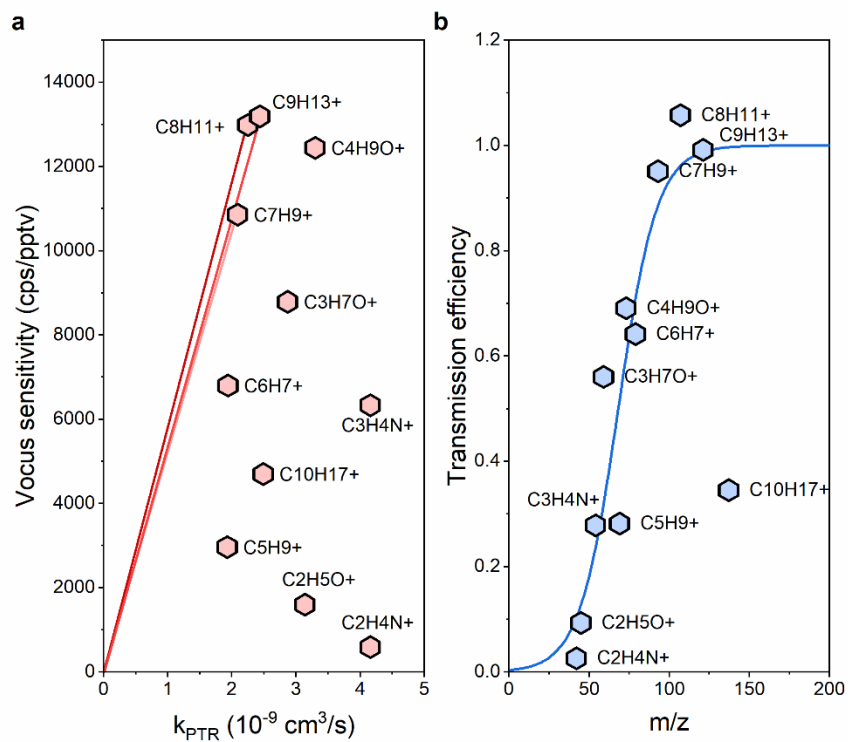

Figure S3. Calibration results of mixed calibration gases. (a) The scatter plot of the sensitivities of mixed calibration gases and their  $k_{PTR}$ . The red lines are linear fitting of C<sub>7</sub>H<sub>9</sub><sup>+</sup>, C<sub>8</sub>H<sub>11</sub><sup>+</sup>, and C<sub>9</sub>H<sub>13</sub><sup>+</sup>, respectively. (b) The transmission efficiency of mixed calibration gases. The blue line is the fitted transmission efficiency curve based on that of mixed calibration gases.

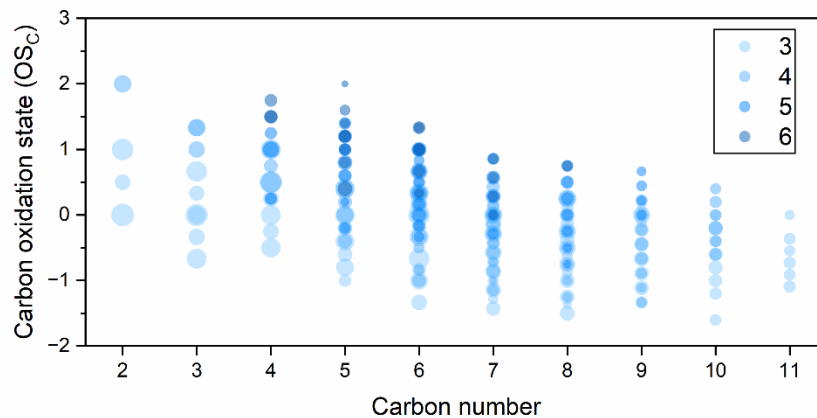

Figure S4. Carbon oxidation state of organic vapors with different oxygens. The sizes of the bubbles are determined by the annual median concentrations. The bubbles are colored by different oxygen numbers as labeled in the legend. Bars labeled as 6 refers to organic vapors with oxygen number equal or larger than 6.

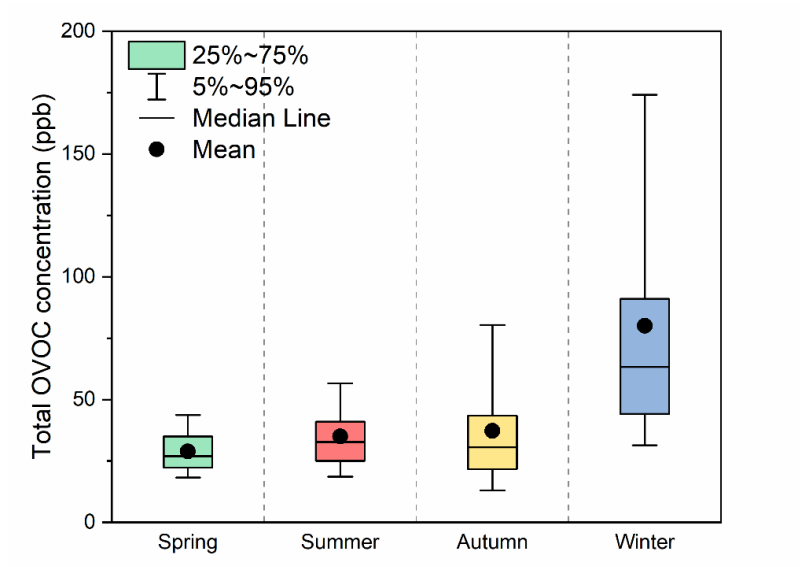

Figure S5. Boxplot of total OVOC concentrations in four seasons.

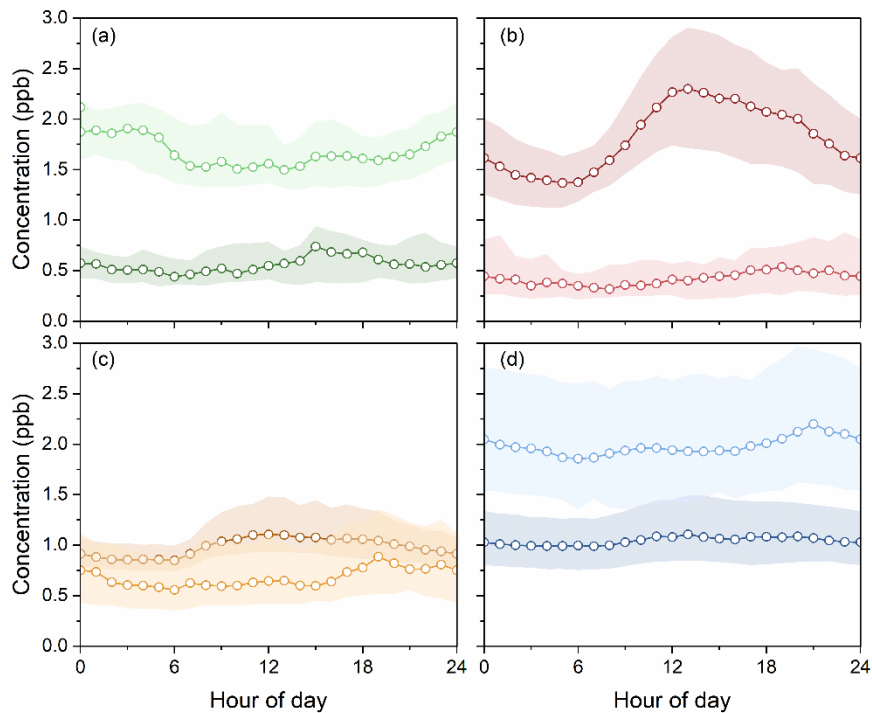

Figure S6. Diurnal variation cluster results of organic vapors with multiple oxygens. Median concentrations are presented. The shaded areas in the graph are 25<sup>th</sup> and 75<sup>th</sup> percentiles. The colors of the clusters are consistent with Figure 5. (a) Spring. (b) Summer. (c) Autumn. (d) Winter.

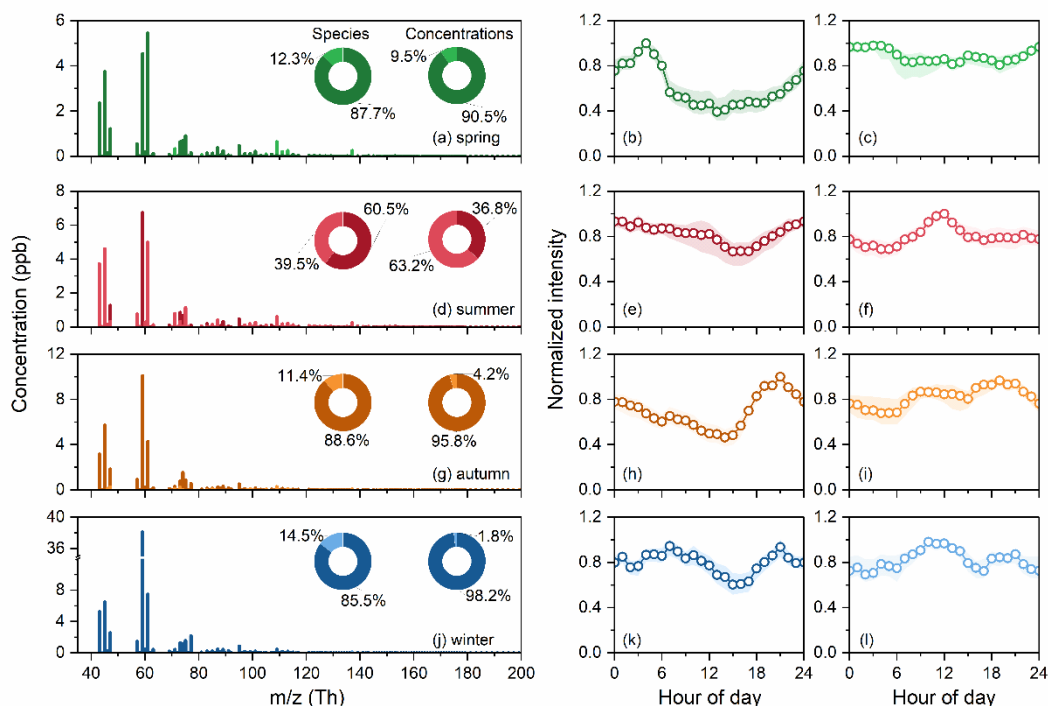

Figure S7. Cluster results of organic vapors with one or two oxygens. (a) – (c) Cluster results for spring. (a) Mass spectra of organic vapors with one or two oxygens in spring. Y axis is the mean concentration of each compound. Two different shades of colors are used to distinguish between two clusters. Two pie charts represent the distribution of species numbers and concentrations of for two clusters. (b) Normalized median diurnal variation of cluster 1. (c) Normalized median diurnal variation of cluster 2. The shaded areas in the graph (b) and (c) represent the 25<sup>th</sup> and 75<sup>th</sup> percentiles. (d) – (f) Cluster results for summer. (g) to (i) Cluster results for autumn. (j) – (l) Cluster results for winter.



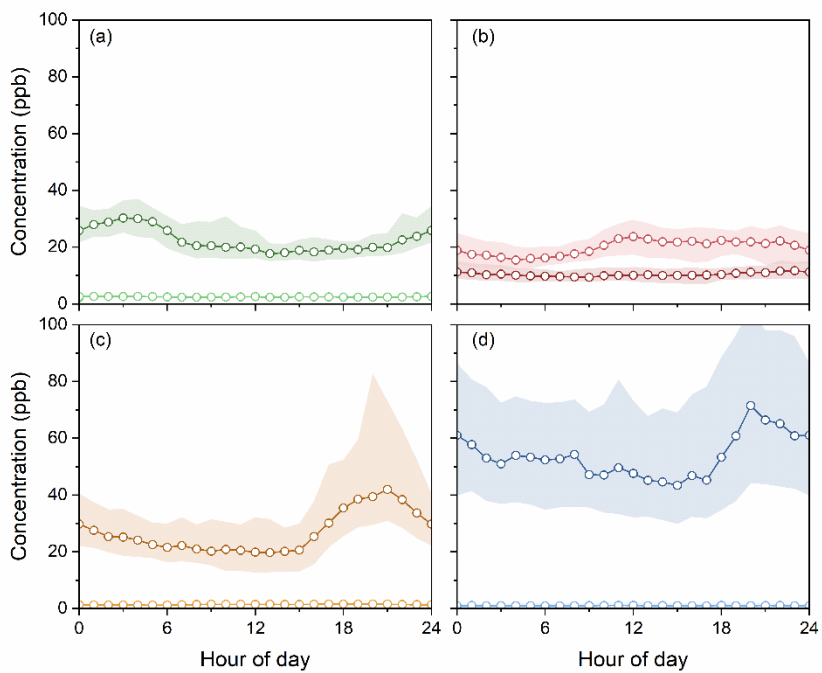

Figure S8. Diurnal variation cluster results of organic vapors with one or two oxygens. Median concentrations are presented. The shaded areas in the graph are 25<sup>th</sup> and 75<sup>th</sup> percentiles. The colors of the clusters are consistent with Figure S8. (a) Spring. (b) Summer. (c) Autumn. (d) Winter.

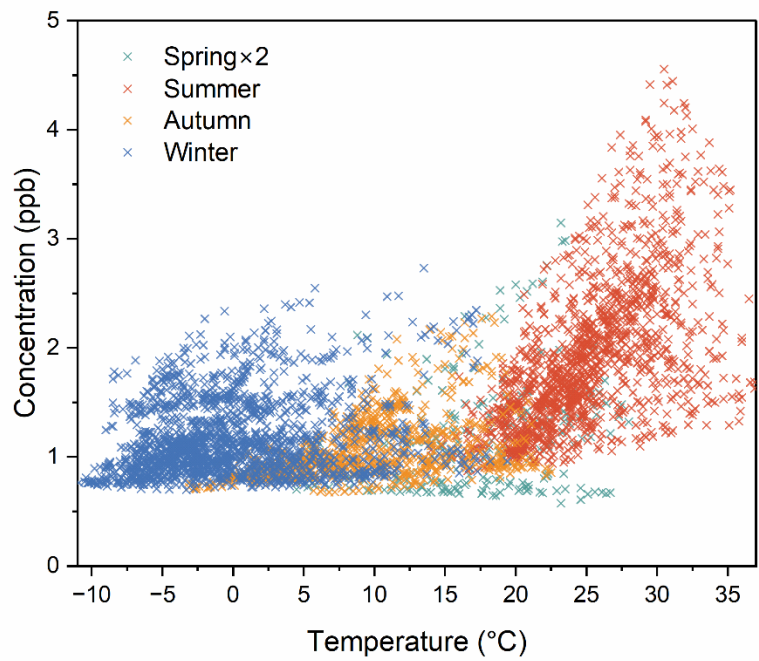

Figure S9. Dependence of daytime clusters on temperature.

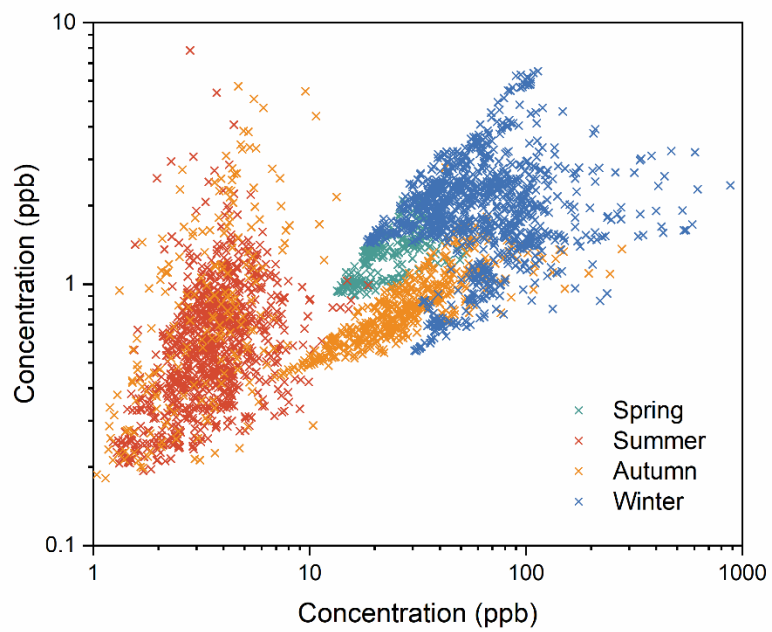

Figure S10. Dependence of nighttime clusters on major clusters of organic vapors with 1-2 oxygens.

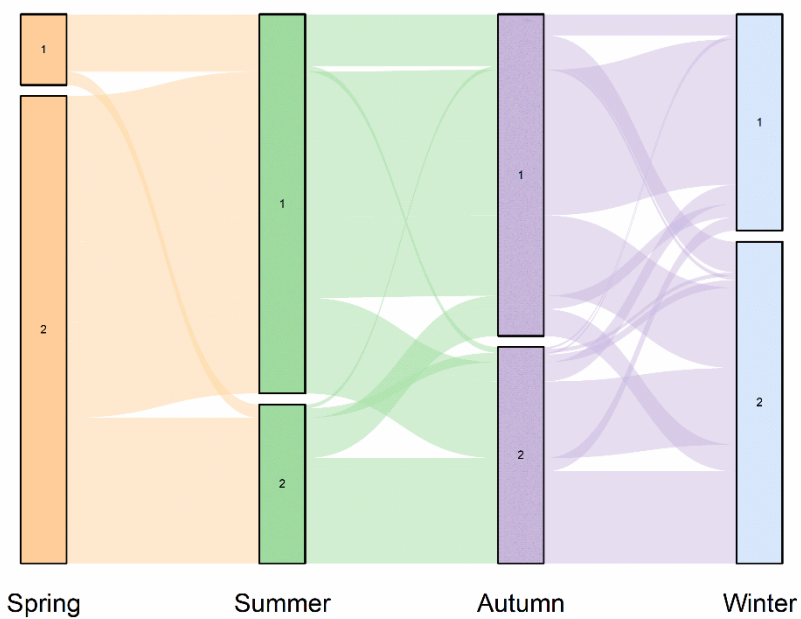

Figure S11. The distribution of organic vapors with multiple oxygens across different clusters.

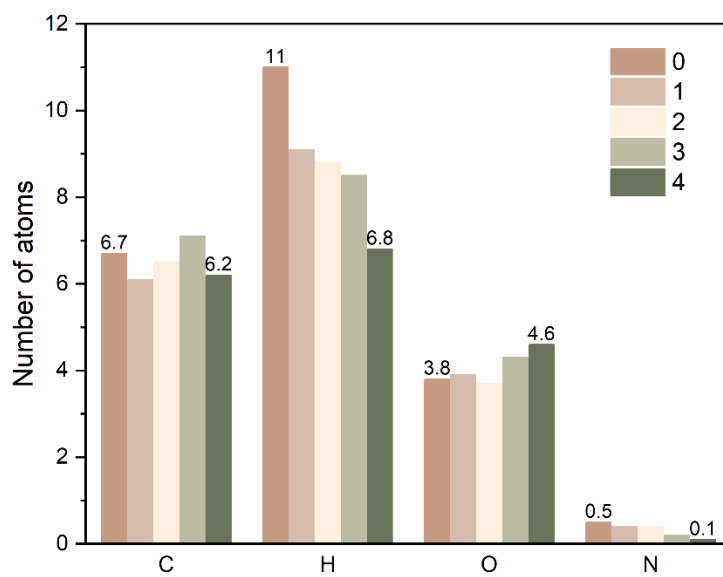

Figure S12. Average C, H, O, and N number of organic vapors containing multiple oxygens with different diurnal patterns. For each compound, different colors labeled as 0 to 4 are used to represent the number of seasons belonging to daytime cluster.

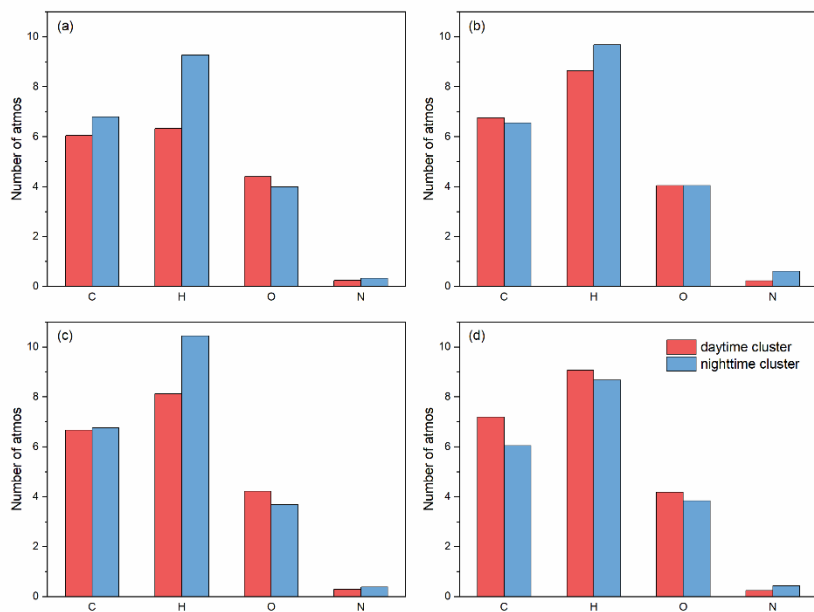

Figure S13. Average C, H, O, and N number of organic vapors containing multiple oxygens in two clusters. (a) Spring. (b) Summer. (c) Autumn. (d) Winter.

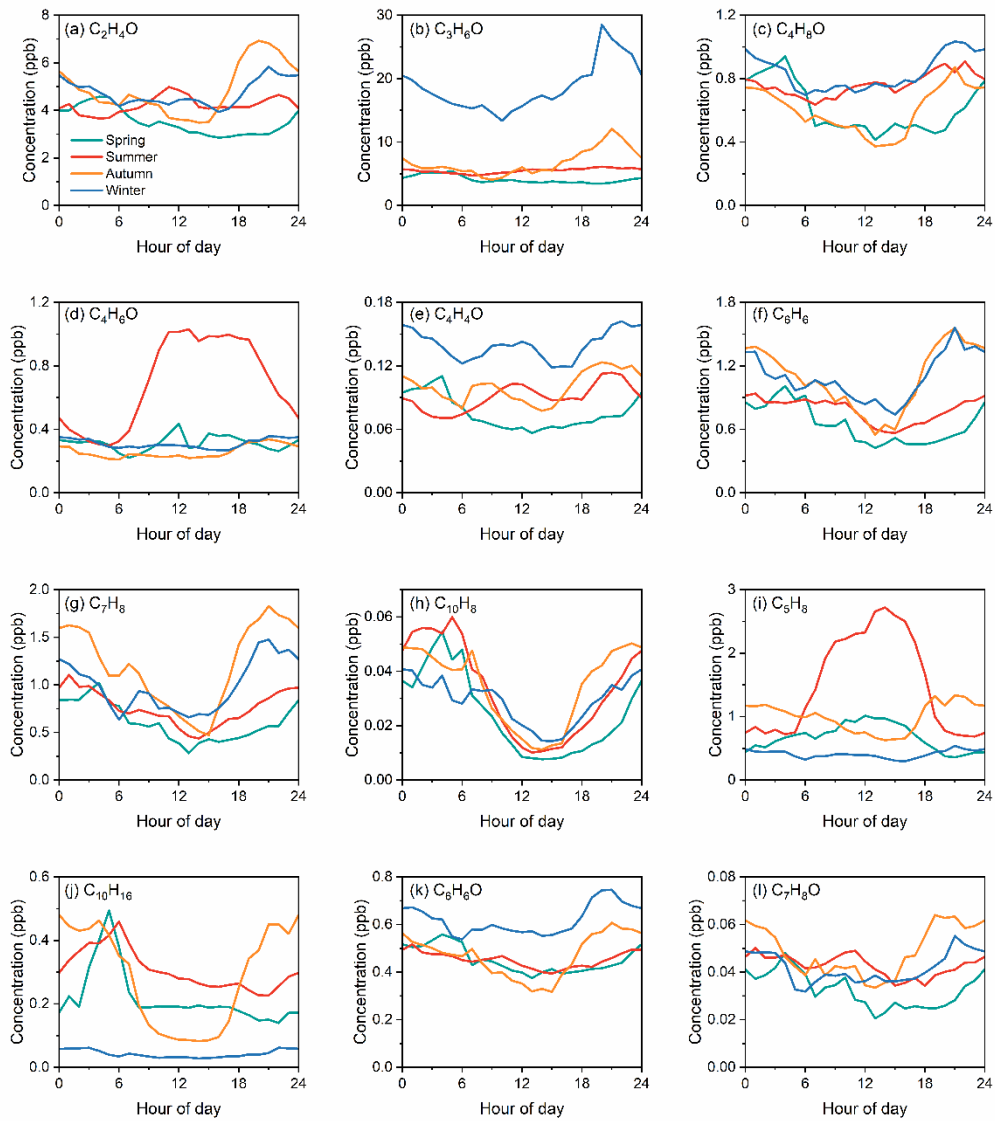

Figure S14. Diurnal profiles of representative VOCs in four seasons. Median concentrations are used.

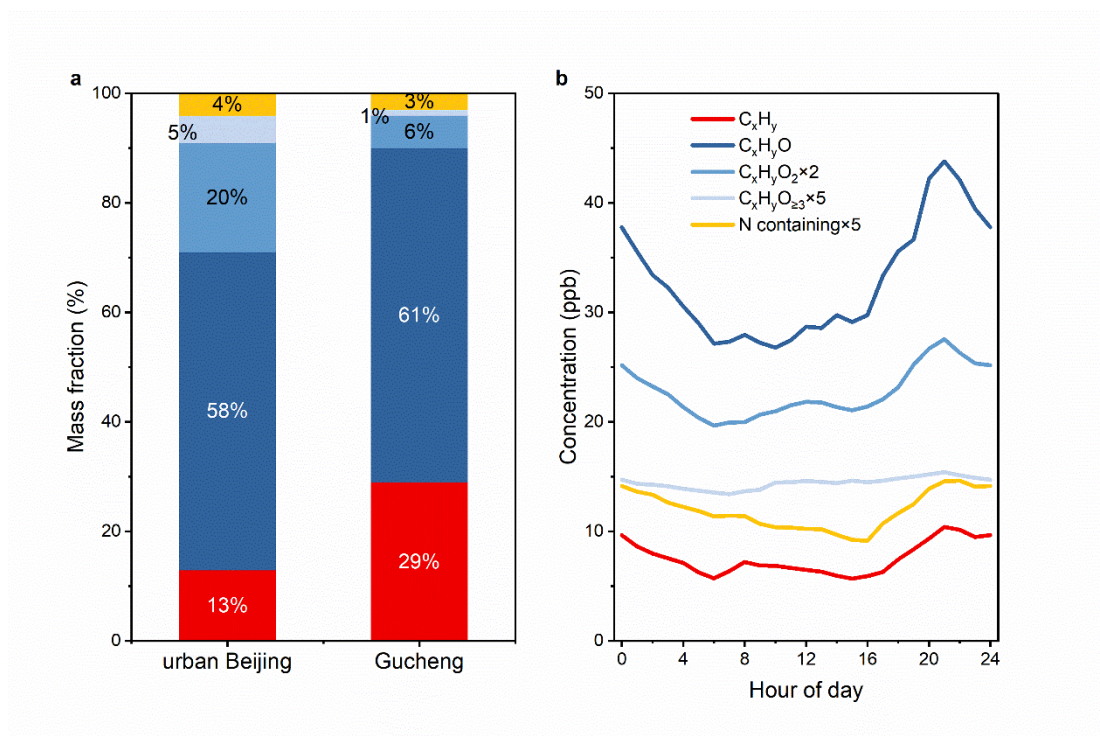

Figure S15. (a) Mass fraction of different categories. Only winter results are used here for urban Beijing. Gucheng results are measured in winter 2018 from He et al., 2022. (b) Diurnal Pattern of different categories in winter.



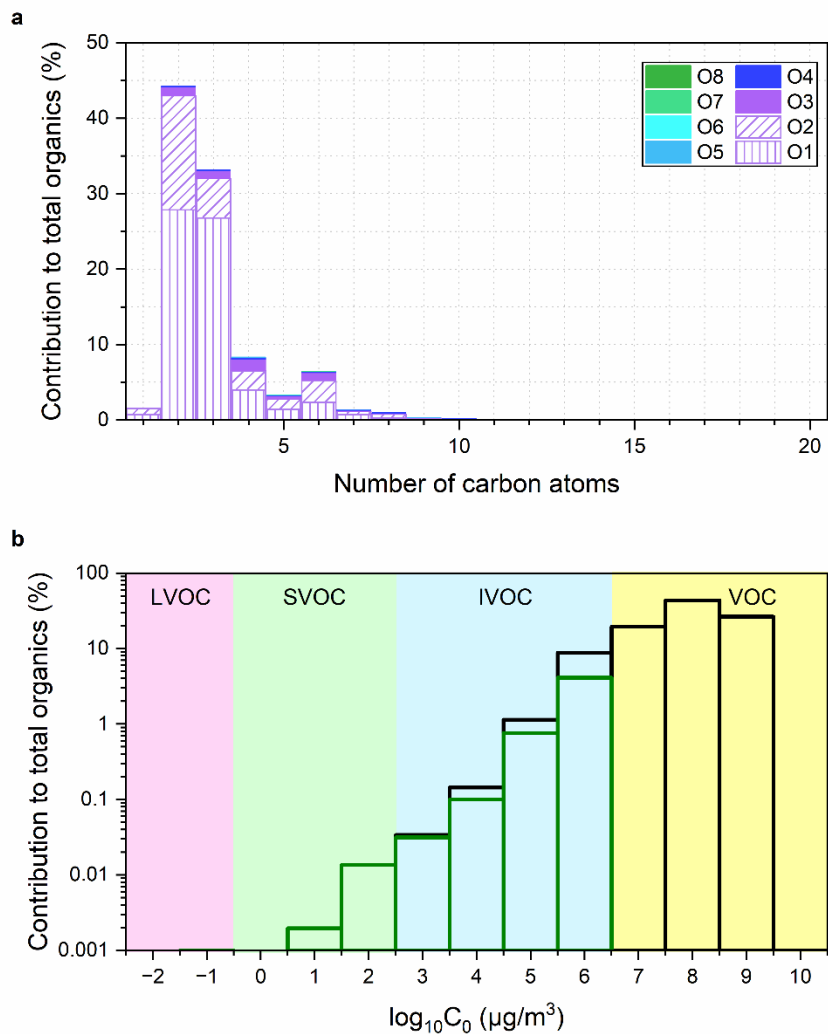

Figure S16. Molecular characteristics of total measured organic vapors by Vocus-PTR. (a) Carbon number distribution. Different colors and patterns of bars refer to compounds with different oxygens. Annual median concentrations are used to calculate the contribution to total organics. (b) Volatility distribution. Bars with black borders represent total measured organic vapors by Vocus-PTR. Bars with green borders represent organic vapors with multiple oxygens ( $\geq 3$ ). Annual median concentrations are used to calculate the contribution to total organics.

Table S1. The observation periods of Vocus-PTR

| Period NO. | Start time | End time   | Season |
|------------|------------|------------|--------|
| 1          | 5/1/2021   | 5/11/2021  | Spring |
| 2          | 6/11/2021  | 7/12/2021  | Summer |
| 3          | 7/27/2021  | 9/8/2021   | Summer |
| 4          | 10/11/2021 | 11/16/2021 | Autumn |
| 5          | 12/27/2021 | 3/10/2022  | Winter |

Table S2. Information about calibration gases

| Name                   | Formula                                      | Concentration (ppb) | Observation periods |
|------------------------|----------------------------------------------|---------------------|---------------------|
| Formaldehyde           | CH <sub>2</sub> O                            | 8.16                | 1, 2, 3             |
| Methanol               | CH <sub>4</sub> O                            |                     |                     |
| Acetonitrile           | C <sub>2</sub> H <sub>3</sub> N              |                     |                     |
| Acetaldehyde           | C <sub>2</sub> H <sub>4</sub> O              |                     |                     |
| Acrylonitrile          | C <sub>3</sub> H <sub>3</sub> N              |                     |                     |
| Acetone                | C <sub>3</sub> H <sub>6</sub> O              |                     |                     |
| Isoprene               | C <sub>5</sub> H <sub>8</sub>                |                     |                     |
| 2-Butanone             | C <sub>4</sub> H <sub>8</sub> O              |                     |                     |
| Benzene                | C <sub>6</sub> H <sub>6</sub>                |                     |                     |
| Toluene                | C <sub>7</sub> H <sub>8</sub>                |                     |                     |
| Xylene                 | C <sub>8</sub> H <sub>10</sub>               |                     |                     |
| 1, 3, 5-Trimethylbenze | C <sub>9</sub> H <sub>12</sub>               |                     |                     |
| α-Pinene               | C <sub>10</sub> H <sub>16</sub>              |                     |                     |
| Methyl vinyl ketone    | C <sub>4</sub> H <sub>6</sub> O              | 20                  | 5*                  |
| Furan, 2-ethyl-        | C <sub>6</sub> H <sub>8</sub> O              |                     |                     |
| Methyl methacrylate    | C <sub>5</sub> H <sub>8</sub> O <sub>2</sub> |                     |                     |
| Toluene                | C <sub>7</sub> H <sub>8</sub>                |                     |                     |
| Xylene                 | C <sub>8</sub> H <sub>10</sub>               |                     |                     |
| α-Pinene               | C <sub>10</sub> H <sub>16</sub>              |                     |                     |
| 1, 3, 5-Trimethylbenze | C <sub>9</sub> H <sub>12</sub>               |                     |                     |
| Caryophyllene          | C <sub>15</sub> H <sub>24</sub>              |                     |                     |
| Naphthalene            | C <sub>10</sub> H <sub>8</sub>               |                     |                     |
| Naphthalene, 1-methly- | C <sub>11</sub> H <sub>10</sub>              |                     |                     |

\*Ethane, 1,1-dichloro-, Benzene, 1,3-dichloro-, and decamethylsiloxane are also included the mixed calibration gases but are not used for calibration.

Table S3. Seasonal concentrations of OVOCs with multiple oxygens

| Category |      |        | Spring | Summer | Autumn | Winter |
|----------|------|--------|--------|--------|--------|--------|
| O = 3    | CHO  | mean   | 1974   | 2165   | 1635   | 2877   |
|          |      | median | 1889   | 1847   | 1392   | 2512   |
|          | CHON | mean   | 37     | 57     | 38     | 56     |
|          |      | median | 34     | 52     | 29     | 46     |
| O = 4    | CHO  | mean   | 226    | 185    | 182    | 385    |
|          |      | median | 221    | 170    | 167    | 382    |
|          | CHON | mean   | 15     | 18     | 13     | 21     |
|          |      | median | 13     | 16     | 11     | 19     |
| O = 5    | CHO  | mean   | 21     | 25     | 16     | 21     |
|          |      | median | 19     | 23     | 15     | 19     |
|          | CHON | mean   | 9.2    | 5.5    | 1.7    | 1.8    |
|          |      | median | 7.4    | 4.8    | 1.4    | 1.4    |
| O ≥ 6    | CHO  | mean   | 9.3    | 10     | 5.6    | 5.5    |
|          |      | median | 8.4    | 9.3    | 4.6    | 4.7    |
|          | CHON | mean   | 1.0    | 1.8    | 0.4    | 0.3    |
|          |      | median | 0.8    | 1.5    | 0.4    | 0.2    |

Units in ppt.

Table S4. Main  $C_xH_yO_{\geq 3}$  and  $C_xH_yO_{\geq 3}N$  species measured in this study

| DBE | CHO                   | CHON                  |
|-----|-----------------------|-----------------------|
| 0   | $C_nH_{2n+2}O_{3,4}$  |                       |
| 1   | $C_nH_{2n}O_{3-8}$    | $C_nH_{2n+1}O_{3-5}N$ |
| 2   | $C_nH_{2n-2}O_{3-6}$  | $C_nH_{2n-1}O_{3-5}N$ |
| 3   | $C_nH_{2n-4}O_{3-8}$  | $C_nH_{2n-3}O_{3-6}N$ |
| 4   | $C_nH_{2n-6}O_{3-7}$  | $C_nH_{2n-5}O_{3-6}N$ |
| 5   | $C_nH_{2n-8}O_{3-6}$  | $C_nH_{2n-7}O_{3-5}N$ |
| 6   | $C_nH_{2n-10}O_{3-6}$ | $C_nH_{2n-9}O_{3,4}N$ |
| 7   | $C_nH_{2n-12}O_{3-5}$ | $C_nH_{2n-11}O_3N$    |
| 8   | $C_nH_{2n-14}O_{3-5}$ | $C_nH_{2n-13}O_3N$    |
| 9   | $C_nH_{2n-16}O_{3,4}$ |                       |
